# Supplementary material for: Survival outcomes following treatment delays among patients with early-stage female cancers: a nationwide study
Source: Springer Nature journal article supplement (doi:10.1186/s12967-022-03719-7), 2022-12-03
Supplement: MOESM1 [file 23786722]

**Table S1.** The code for International Classification of Disease for Oncology third edition in the present study.

| Cancer types                  | ICD-O-3                                                                                                                                                                                                           |
|-------------------------------|-------------------------------------------------------------------------------------------------------------------------------------------------------------------------------------------------------------------|
| Non-small cell lung cancer    | 8046/3, 8070/3-8074/3, 8084/3,8140/3, 8250/3 ,8252/3, 8253/3, 8255/3, 8480/3, 8560/3                                                                                                                              |
| Infiltrating breast cancer    | 8500/3, 8520/3-8524/3                                                                                                                                                                                             |
| Colorectum cancer             | 8140/3, 8143/3, 8145/3, 8201/3, 8210/3, 8211/3, 8213/3, 8220/3, 8221/3, 8255/3, 8260/3-8263/3, 8310/3, 8323/3, 8380/3, 8480/3, 8481/3, 8490/3, 8500/3, 8510/3, 8550/3, 8560/3, 8572/3, 8574/3, 8576/3             |
| Cervical cancer               | 8051/3, 8052/3, 8070/3-8074/3, 8076/3, 8082/3-8084/3, 8140/3, 8144/3, 8200/3, 8210/3,8255/3, 8260/3-8263/3, 8310/3, 8323/3, 8380/3, 8382/3, 8384/3, 8441/3, 8460/3, 8480/3-8482/3, 8490/3, 8560/3, 8570/3, 8574/3 |
| Differentiated thyroid cancer | 8050/3, 8060/3, 8330/3-8332/3, 8335/3, 8340/3-8344/3, 8504/3, 8507/3                                                                                                                                              |

**Table S2.** The cancer-specific characteristics of five different cancers.

| Variables         | Subgroup           | No. (%) of patients or Median (range) |                       |                       |                          |                       |
|-------------------|--------------------|---------------------------------------|-----------------------|-----------------------|--------------------------|-----------------------|
|                   |                    | Lung<br>(n=12,617)                    | Breast<br>(n=166,051) | Thyroid<br>(n=31,096) | Colorectal<br>(n=23,550) | Cervical<br>(n=8,347) |
| Histology         | Adenocarcinoma     | 8722(69.1)                            | /                     | /                     | 23550(100.0)             | 2,684(32.2)           |
|                   | Squamous           | 3895(30.9)                            | /                     | /                     | /                        | 5,360(64.2)           |
|                   | Adenosquamous      | /                                     | /                     | /                     | /                        | 302(3.6)              |
|                   | IDC                | /                                     | 141730(85.4)          | /                     | /                        | /                     |
|                   | ILC                | /                                     | 14673(8.8)            | /                     | /                        | /                     |
|                   | IDLC               | /                                     | 9649(5.8)             | /                     | /                        | /                     |
|                   | PTC                | /                                     | /                     | 19,544(62.9)          | /                        | /                     |
|                   | FTC                | /                                     | /                     | 10,241(32.9)          | /                        | /                     |
|                   | PTCfv              | /                                     | /                     | 1,311(4.2)            | /                        | /                     |
| Primary site      | Upper lobe         | 7490(59.4)                            | /                     | /                     | /                        | /                     |
|                   | Mid lobe           | 602(4.8)                              | /                     | /                     | /                        | /                     |
|                   | Lower lobe         | 4181(33.1)                            | /                     | /                     | /                        | /                     |
|                   | Nipple and central | /                                     | 7,060(4.2)            | /                     | /                        | /                     |
|                   | Inner              | /                                     | 32,335(19.5)          | /                     | /                        | /                     |
|                   | Outer              | /                                     | 72,091(43.4)          | /                     | /                        | /                     |
|                   | Right              | /                                     | /                     | /                     | 10632(45.1)              | /                     |
|                   | Left               | /                                     | /                     | /                     | 6646(28.2)               | /                     |
|                   | Rectum             | /                                     | /                     | /                     | 5988(25.5)               | /                     |
|                   | Other <sup>a</sup> | 344(2.7)                              | 54,565(32.9)          | 31,096(100.0)         | 284(1.2)                 | 8,346(100.0)          |
| Molecular subtype | HR+/HER2+          | /                                     | 17,699(10.7)          | /                     | /                        | /                     |
|                   | HR+/HER2-          | /                                     | 12,4107(74.7)         | /                     | /                        | /                     |
|                   | HR-/HER2+          | /                                     | 6,888(4.1)            | /                     | /                        | /                     |
|                   | HR-/HER2-          | /                                     | 17,357(10.5)          | /                     | /                        | /                     |

Note: Other<sup>a</sup>: Not listed the detailed location of the primary tumor site;

Abbreviation: IDC: infiltrating ductal carcinoma; ILC: infiltrating lobular carcinoma; IDLC: infiltrating ductal mixed lobular carcinoma; PTC: papillary thyroid carcinoma; FTC: follicular thyroid carcinoma PTCfv: papillary thyroid carcinoma, follicular variate; HR: hormone receptor, HER-2: human epidermal growth factor receptor-2.

**Table S3-1.** Univariate and Multivariable Cox analyses of the association of treatment delays intervals with overall survival (treatment delays was calculated as continuous variable).

| Cancer                             | Model 1                 |                | Model 2 <sup>a</sup> |                |
|------------------------------------|-------------------------|----------------|----------------------|----------------|
|                                    | HR <sup>b</sup> (95%CI) | <i>P</i>       | HR (95%CI)           | <i>P</i>       |
| <b>NSCLC</b>                       |                         |                |                      |                |
| Stage I                            | 1.20(1.17-1.23)         | < <b>0.001</b> | 1.04(1.01-1.06)      | <b>0.010</b>   |
| Stage II                           | 1.10(1.06-1.14)         | < <b>0.001</b> | 1.00(0.96-1.04)      | 0.983          |
| <b>IBC</b>                         |                         |                |                      |                |
| Stage I                            | 1.02(0.99-1.05)         | 0.150          | 1.03(1.00-1.06)      | <b>0.029</b>   |
| Stage II                           | 1.00(0.98-1.03)         | 0.771          | 1.01(0.99-1.03)      | 0.377          |
| <b>DTC</b>                         |                         |                |                      |                |
| Stage I                            | 0.76(0.68-0.87)         | < <b>0.001</b> | 0.94(0.83-1.06)      | 0.296          |
| Stage II                           | 0.71(0.52-0.98)         | <b>0.038</b>   | 0.70(0.50-0.97)      | <b>0.035</b>   |
| <b>Colorectal cancer</b>           |                         |                |                      |                |
| Stage I                            | 1.07(1.01-1.12)         | <b>0.013</b>   | 0.97(0.92-1.03)      | 0.358          |
| Stage II                           | 0.95(0.91-0.99)         | <b>0.017</b>   | 0.89(0.85-0.93)      | < <b>0.001</b> |
| <b>Cervical cancer<sup>c</sup></b> |                         |                |                      |                |
| Stage I                            | 1.16(1.09-1.24)         | < <b>0.001</b> | 0.95(0.89-1.03)      | 0.217          |
| Stage II                           | 1.02(0.95-1.10)         | 0.529          | 0.99(0.91-1.07)      | 0.833          |

Note: Model 2<sup>a</sup> was adjusted by the age, race, tumor location (exception of DTC, cervical cancer), differentiated grade; histology (exception of colorectal cancer), T stage, N stage (exception of NSCLC in stage I, DTC in stage II, colorectal cancer), surgery (exception of DTC), radiotherapy, chemotherapy (exception of DTC), marital status, income, and molecular subtype (only for breast cancer).

HR<sup>b</sup>: compared with immediate treatment initiation; Cervical cancer<sup>c</sup>: FIGO stage.

Abbreviation: HR: Hazard ratio, CI: confidence interval; NSCLC: non-small cell lung cancer, IBC: infiltrating breast cancer, DTC: differentiated thyroid carcinoma.

Bold values indicate statistical significance ( $p < 0.05$ )

**Table S3-2.** Univariate and Multivariable Cox analyses of the association of treatment delays intervals with cancer-specific survival (treatment delays was calculated as continuous variable).

| Cancer                   | Model 1                 |                | Model 2 <sup>a</sup> |          |
|--------------------------|-------------------------|----------------|----------------------|----------|
|                          | HR <sup>b</sup> (95%CI) | <i>P</i>       | HR (95%CI)           | <i>P</i> |
| <b>NSCLC</b>             |                         |                |                      |          |
| Stage I                  | 1.20(1.16-1.24)         | < <b>0.001</b> | 1.02(0.98-1.06)      | 0.286    |
| Stage II                 | 1.06(1.02-1.11)         | <b>0.002</b>   | 0.97(0.93-1.01)      | 0.144    |
| <b>IBC</b>               |                         |                |                      |          |
| Stage I                  | 0.97(0.91-1.02)         | 0.217          | 0.97(0.92-1.03)      | 0.321    |
| Stage II                 | 0.97(0.94-1.00)         | <b>0.029</b>   | 0.99(0.97-1.02)      | 0.747    |
| <b>DTC</b>               |                         |                |                      |          |
| Stage I                  | 1.12(0.69-1.82)         | 0.649          | 1.04(0.61-1.77)      | 0.877    |
| Stage II                 | 0.13(0.00-10.92)        | 0.367          | 0.11(0.00-5.93)      | 0.277    |
| <b>Colorectal cancer</b> |                         |                |                      |          |
| Stage I                  | 1.25(1.14-1.36)         | < <b>0.001</b> | 0.99(0.89-1.09)      | 0.795    |

|                                    |                 |                  |                 |                  |
|------------------------------------|-----------------|------------------|-----------------|------------------|
| <b>Stage II</b>                    | 0.94(0.89-1.00) | <b>0.044</b>     | 0.83(0.78-0.88) | <b>&lt;0.001</b> |
| <b>Cervical cancer<sup>c</sup></b> |                 |                  |                 |                  |
| <b>Stage I</b>                     | 1.23(1.14-1.33) | <b>&lt;0.001</b> | 1.03(0.94-1.13) | 0.480            |
| <b>Stage II</b>                    | 1.04(0.95-1.14) | 0.380            | 1.02(0.93-1.12) | 0.716            |

Note: Model 2<sup>a</sup> was adjusted by the age, race, tumor location (exception of DTC, cervical cancer), differentiated grade; histology (exception of colorectal cancer), T stage, N stage (exception of NSCLC in stage I, DTC in stage II, colorectal cancer), surgery (exception of DTC), radiotherapy, chemotherapy (exception of DTC), marital status, income, and molecular subtype (only for breast cancer).

HR<sup>b</sup>: compared with immediate treatment initiation; Cervical cancer<sup>c</sup>: FIGO stage.

Abbreviation: HR: Hazard ratio, CI: confidence interval; NSCLC: non-small cell lung cancer, IBC: infiltrating breast cancer, DTC: differentiated thyroid carcinoma.

Bold values indicate statistical significance ( $p < 0.05$ )

**Table S4-1.** Multivariable analyses of the association of treatment delays intervals with overall survival in NSCLC (stage I).

| Variables                         | Subgroup*          | Hazard ratio (95%CI) | P                |
|-----------------------------------|--------------------|----------------------|------------------|
| <b>Treatment delays intervals</b> | Immediate          | Reference            |                  |
|                                   | Intermediate       | 1.04(0.95-1.13)      | 0.349            |
|                                   | Long               | 1.11(1.01-1.23)      | <b>0.044</b>     |
| <b>Race</b>                       | White              | Reference            |                  |
|                                   | Black              | 0.90(0.80-1.01)      | 0.088            |
|                                   | other <sup>a</sup> | 0.69(0.59-0.80)      | <b>&lt;0.001</b> |
| <b>Location</b>                   | Upper lobe         | Reference            |                  |
|                                   | Mid lobe           | 0.98(0.84-1.15)      | 0.809            |
|                                   | Lower lobe         | 1.08(1.01-1.16)      | <b>0.030</b>     |
|                                   | Other <sup>b</sup> | 1.10(0.89-1.34)      | 0.373            |
| <b>Grade</b>                      | I                  | Reference            |                  |
|                                   | II                 | 1.68(1.51-1.87)      | <b>&lt;0.001</b> |
|                                   | III/IV             | 2.00(1.77-2.23)      | <b>&lt;0.001</b> |
|                                   | Unknown            | 1.61(1.41-1.83)      | <b>&lt;0.001</b> |
| <b>Histology</b>                  | Adenocarcinoma     | Reference            |                  |
|                                   | Squamous           | 1.32(1.23-1.41)      | <b>&lt;0.001</b> |
| <b>T stage</b>                    | T1                 | Reference            |                  |
|                                   | T2                 | 1.32(1.23-1.41)      | <b>&lt;0.001</b> |
| <b>Surgery</b>                    | Not performed      | Reference            |                  |
|                                   | Performed          | 0.48(0.40-0.59)      | <b>&lt;0.001</b> |
| <b>Radiotherapy</b>               | Not performed      | Reference            |                  |
|                                   | Performed          | 1.32(1.10-1.59)      | <b>0.003</b>     |
| <b>Chemotherapy</b>               | Not performed      | Reference            |                  |
|                                   | Performed          | 1.15(1.03-1.28)      | <b>0.014</b>     |
| <b>Age</b>                        | /                  | 1.03(1.03-1.03)      | <b>&lt;0.001</b> |
| <b>Marital status</b>             | Married            | Reference            |                  |
|                                   | Single             | 1.23(1.11-1.37)      | <b>&lt;0.001</b> |
|                                   | Other <sup>c</sup> | 1.19(1.11-1.28)      | <b>&lt;0.001</b> |
|                                   | Unknown            | 1.02(0.87-1.19)      | 0.829            |
| <b>Income</b>                     | < 35K              | Reference            |                  |
|                                   | 35K-<55K           | 0.92(0.76-1.11)      | 0.385            |
|                                   | 55k-<75k           | 0.85(0.70-1.03)      | 0.088            |
|                                   | >75k               | 0.73(0.60-0.89)      | <b>0.002</b>     |

Note: \*subgroup: immediate: < 1 month, intermediate delayed: ≥1 and ≤2 months, and long delayed: ≥ 3 months; other<sup>a</sup>: defined as the Asian/Pacific Islander and American Indian/Alaska Native; Other<sup>b</sup>: Not listed the detailed location of the primary tumor site; Other<sup>c</sup>: Divorced, separated, widowed, Unmarried or Domestic Partner.

Abbreviation: CI: confidence interval; NSCLC: non-small cell lung cancer.

Bold values indicate statistical significance ( $p < 0.05$ )

**Table S4-2.** Multivariable analyses of the association of treatment delays intervals with overall survival

in NSCLC (stage II).

| Variables                         | Subgroup*          | Hazard ratio (95%CI) | P                |
|-----------------------------------|--------------------|----------------------|------------------|
| <b>Treatment delays intervals</b> | Immediate          | Reference            |                  |
|                                   | Intermediate       | 0.97(0.87-1.09)      | 0.699            |
|                                   | Long               | 1.00(0.86-1.16)      | 0.995            |
| <b>Race</b>                       | White              | Reference            |                  |
|                                   | Black              | 0.92(0.79-1.07)      | 0.289            |
|                                   | other <sup>a</sup> | 0.88(0.73-1.05)      | 0.162            |
| <b>Location</b>                   | Upper lobe         | Reference            |                  |
|                                   | Mid lobe           | 1.13(0.91-1.40)      | 0.270            |
|                                   | Lower lobe         | 1.11(1.01-1.22)      | <b>0.032</b>     |
|                                   | Other <sup>b</sup> | 1.06(0.87-1.29)      | 0.558            |
| <b>Grade</b>                      | I                  | Reference            |                  |
|                                   | II                 | 1.23(1.03-1.48)      | <b>0.023</b>     |
|                                   | III/IV             | 1.44(1.20-1.73)      | <b>&lt;0.001</b> |
|                                   | Unknown            | 1.18(0.96-1.45)      | 0.109            |
| <b>Histology</b>                  | Adenocarcinoma     | Reference            |                  |
|                                   | Squamous           | 1.11(1.01-1.22)      | <b>0.027</b>     |
| <b>T stage</b>                    | T1                 | Reference            |                  |
|                                   | T2                 | 0.95(0.82-1.10)      | 0.482            |
|                                   | T3                 | 0.92(0.76-1.11)      | 0.363            |
| <b>N stage</b>                    | N0                 | Reference            |                  |
|                                   | N1                 | 1.06(0.92-1.21)      | 0.421            |
| <b>Surgery</b>                    | Not performed      | Reference            |                  |
|                                   | Performed          | 0.42(0.36-0.49)      | <b>&lt;0.001</b> |
| <b>Radiotherapy</b>               | Not performed      | Reference            |                  |
|                                   | Performed          | 1.14(0.99-1.31)      | 0.077            |
| <b>Chemotherapy</b>               | Not performed      | Reference            |                  |
|                                   | Performed          | 0.86(0.78-0.94)      | <b>0.002</b>     |
| <b>Age</b>                        | /                  | 1.02(1.01-1.03)      | <b>&lt;0.001</b> |
| <b>Marital status</b>             | Married            | Reference            |                  |
|                                   | Single             | 1.09(0.94-1.26)      | 0.262            |
|                                   | Other <sup>c</sup> | 1.04(0.94-1.14)      | 0.464            |
|                                   | Unknown            | 0.99(0.79-1.23)      | 0.899            |
| <b>Income</b>                     | < 35K              | Reference            |                  |
|                                   | 35K-<55K           | 0.70(0.56-0.89)      | <b>0.003</b>     |
|                                   | 55k-<75k           | 0.64(0.51-0.80)      | <b>&lt;0.001</b> |
|                                   | >75k               | 0.62(0.49-0.79)      | <b>&lt;0.001</b> |

Note: \*subgroup: immediate: < 1 month, intermediate delayed: ≥1 and ≤2 months, and long delayed: ≥ 3 months; other<sup>a</sup>: defined as the Asian/Pacific Islander and American Indian/Alaska Native; Other<sup>b</sup>: Not listed the detailed location of the primary tumor site; Other<sup>c</sup>: Divorced, separated, windowed, Unmarried or Domestic Partner.

**Table S5-1.** Multivariable analyses of the association of treatment delays intervals with overall survival in infiltrating breast cancer (stage I).

| <b>Variables</b>                  | <b>Subgroup*</b>   | <b>Hazard ratio (95%CI)</b> | <b>P</b>         |
|-----------------------------------|--------------------|-----------------------------|------------------|
| <b>Treatment delays intervals</b> | Immediate          | Reference                   |                  |
|                                   | Intermediate       | 0.92(0.87-0.97)             | <b>0.003</b>     |
|                                   | Long               | 1.23(1.11-1.37)             | <b>&lt;0.001</b> |
| <b>Race</b>                       | White              | Reference                   |                  |
|                                   | Black              | 1.22(1.13-1.32)             | <b>&lt;0.001</b> |
|                                   | other <sup>a</sup> | 0.72(0.65-0.80)             | <b>&lt;0.001</b> |
| <b>Location</b>                   | Nipple and central | Reference                   |                  |
|                                   | Inner              | 0.97(0.86-1.10)             | 0.662            |
|                                   | Outer              | 0.96(0.86-1.08)             | 0.531            |
|                                   | Other <sup>b</sup> | 0.98(0.87-1.11)             | 0.801            |
| <b>Grade</b>                      | I                  | Reference                   |                  |
|                                   | II                 | 1.15(1.09-1.22)             | <b>&lt;0.001</b> |
|                                   | III/IV             | 1.61(1.50-1.74)             | <b>&lt;0.001</b> |
|                                   | Unknown            | 1.07(0.91-1.26)             | 0.391            |
| <b>Histology</b>                  | IDC                | Reference                   |                  |
|                                   | ILC                | 0.93(0.85-1.02)             | 0.213            |
|                                   | IDLC               | 0.95(0.85-1.06)             | 0.327            |
| <b>N stage</b>                    | N0                 | Reference                   |                  |
|                                   | N1                 | 1.44(1.31-1.60)             | <b>&lt;0.001</b> |
| <b>Surgery</b>                    | Not performed      | Reference                   |                  |
|                                   | Performed          | 0.23(0.18-0.31)             | <b>&lt;0.001</b> |
| <b>Radiotherapy</b>               | Not performed      | Reference                   |                  |
|                                   | Performed          | 0.62(0.59-0.65)             | <b>&lt;0.001</b> |
| <b>Chemotherapy</b>               | Not performed      | Reference                   |                  |
|                                   | Performed          | 1.06(0.99-1.14)             | 0.109            |
| <b>Age</b>                        | /                  | 1.08(1.07-1.08)             | <b>&lt;0.001</b> |
| <b>Marital status</b>             | Married            | Reference                   |                  |
|                                   | Single             | 1.46(1.35-1.58)             | <b>&lt;0.001</b> |
|                                   | Other <sup>c</sup> | 1.54(1.46-1.62)             | <b>&lt;0.001</b> |
|                                   | Unknown            | 1.27(1.14-1.43)             | <b>&lt;0.001</b> |
| <b>Income</b>                     | < 35K              | Reference                   |                  |
|                                   | 35K-<55K           | 0.88(0.75-1.04)             | 0.142            |
|                                   | 55k-<75k           | 0.70(0.60-0.83)             | <b>&lt;0.001</b> |
|                                   | >75k               | 0.60(0.51-0.71)             | <b>&lt;0.001</b> |
| <b>Subtype</b>                    | HR+/HER2+          | Reference                   |                  |
|                                   | HR+/HER2-          | 1.08(0.98-1.20)             | 0.117            |
|                                   | HR-/HER2+          | 1.06(0.90-1.24)             | 0.468            |
|                                   | HR-/HER2-          | 1.50(1.34-1.67)             | <b>&lt;0.001</b> |

Note: \*subgroup: immediate: < 1 month, intermediate delayed: ≥1 and ≤2 months, and long delayed: ≥ 3 months; other<sup>a</sup>: defined as the Asian/Pacific Islander and American Indian/Alaska Native; Other<sup>b</sup>: Not listed the detailed location of the primary tumor site; Other<sup>c</sup>: Divorced, separated, widowed,

Unmarried or Domestic Partner.

Abbreviation: CI: confidence interval; HR: hormone receptor, HER-2: human epidermal growth factor receptor-2.

Bold values indicate statistical significance ( $p < 0.05$ )

**Table S5-2.** Multivariable analyses of the association of treatment delays intervals with overall survival in infiltrating breast cancer (stage II).

| <b>Variables</b>                  | <b>Subgroup*</b>   | <b>Hazard ratio (95%CI)</b> | <b>P</b>         |
|-----------------------------------|--------------------|-----------------------------|------------------|
| <b>Treatment delays intervals</b> | Immediate          | Reference                   |                  |
|                                   | Intermediate       | 0.93(0.88-0.97)             | <b>0.002</b>     |
|                                   | Long               | 1.09(0.99-1.19)             | 0.059            |
| <b>Race</b>                       | White              | Reference                   |                  |
|                                   | Black              | 1.22(1.15-)                 | <b>&lt;0.001</b> |
|                                   | other <sup>a</sup> | 0.77(0.71-0.84)             | <b>&lt;0.001</b> |
| <b>Location</b>                   | Nipple and central | Reference                   |                  |
|                                   | Inner              | 1.06(0.96-1.17)             | 0.236            |
|                                   | Outer              | 0.89(0.82-0.98)             | 0.018            |
|                                   | Other <sup>b</sup> | 1.00(0.91-1.10)             | 0.978            |
| <b>Grade</b>                      | I                  | Reference                   |                  |
|                                   | II                 | 1.43(1.32-1.55)             | <b>&lt;0.001</b> |
|                                   | III/IV             | 2.16(1.98-2.35)             | <b>&lt;0.001</b> |
|                                   | Unknown            | 1.87(1.62-2.15)             | <b>&lt;0.001</b> |
| <b>Histology</b>                  | IDC                | Reference                   |                  |
|                                   | ILC                | 0.83(0.77-0.89)             | <b>&lt;0.001</b> |
|                                   | IDLC               | 0.83(0.76-0.92)             | <b>&lt;0.001</b> |
| <b>T stage</b>                    | T1                 | Reference                   |                  |
|                                   | T2                 | 1.76(1.65-1.89)             | <b>&lt;0.001</b> |
|                                   | T3                 | 2.76(2.47-3.09)             | <b>&lt;0.001</b> |
| <b>N stage</b>                    | N0                 | Reference                   |                  |
|                                   | N1                 | 1.70(1.62-1.78)             | <b>&lt;0.001</b> |
| <b>Surgery</b>                    | Not performed      | Reference                   |                  |
|                                   | Performed          | 0.47(0.42-0.52)             | <b>&lt;0.001</b> |
| <b>Radiotherapy</b>               | Not performed      | Reference                   |                  |
|                                   | Performed          | 0.78(0.74-0.81)             | <b>&lt;0.001</b> |
| <b>Chemotherapy</b>               | Not performed      | Reference                   |                  |
|                                   | Performed          | 0.72(0.69-0.76)             | <b>&lt;0.001</b> |
| <b>Age</b>                        | /                  | 1.04(1.04-1.04)             | <b>&lt;0.001</b> |
| <b>Marital status</b>             | Married            | Reference                   |                  |
|                                   | Single             | 1.34(1.27-1.43)             | <b>&lt;0.001</b> |
|                                   | Other <sup>c</sup> | 1.34(1.28-1.41)             | <b>&lt;0.001</b> |
|                                   | Unknown            | 1.27(1.15-1.39)             | <b>&lt;0.001</b> |
| <b>Income</b>                     | < 35K              | Reference                   |                  |
|                                   | 35K-<55K           | 0.79(0.69-0.90)             | <b>&lt;0.001</b> |
|                                   | 55k-<75k           | 0.65(0.57-0.74)             | <b>&lt;0.001</b> |



|                |           |                 |                  |
|----------------|-----------|-----------------|------------------|
|                | >75k      | 0.58(0.51-0.66) | <b>&lt;0.001</b> |
| <b>Subtype</b> | HR+/HER2+ | Reference       |                  |
|                | HR+/HER2- | 1.20(1.11-1.29) | <b>&lt;0.001</b> |
|                | HR-/HER2+ | 1.16(1.04-1.29) | <b>&lt;0.001</b> |
|                | HR-/HER2- | 2.20(2.02-2.38) | <b>&lt;0.001</b> |

Note: \*subgroup: immediate: < 1 month, intermediate delayed:  $\geq 1$  and  $\leq 2$  months, and long delayed:  $\geq 3$  months; other<sup>a</sup>: defined as the Asian/Pacific Islander and American Indian/Alaska Native; Other<sup>b</sup>: Not listed the detailed location of the primary tumor site; Other<sup>c</sup>: Divorced, separated, widowed, Unmarried or Domestic Partner.

Abbreviation: CI: confidence interval; HR: hormone receptor, HER-2: human epidermal growth factor receptor-2.

Bold values indicate statistical significance ( $p < 0.05$ )

**Table S6-1.** Multivariable analyses of the association of treatment delays intervals with overall survival in DTC (stage I).

| Variables                         | Subgroup*          | Hazard ratio (95%CI) | P                |
|-----------------------------------|--------------------|----------------------|------------------|
| <b>Treatment delays intervals</b> | Immediate          | Reference            |                  |
|                                   | Intermediate       | 0.70(0.53-0.93)      | <b>0.012</b>     |
| <b>Race</b>                       | Long               | 1.09(0.70-1.70)      | 0.711            |
|                                   | White              | Reference            |                  |
|                                   | Black              | 1.71(1.30-2.25)      | <b>&lt;0.001</b> |
| <b>Grade</b>                      | other <sup>a</sup> | 0.44(0.26-0.73)      | <b>0.001</b>     |
|                                   | I                  | Reference            |                  |
|                                   | II                 | 0.60(0.30-1.19)      | 0.145            |
|                                   | III/IV             | 5.00(2.14-11.66)     | <b>&lt;0.001</b> |
| <b>Histology</b>                  | Unknown            | 0.89(0.71-1.12)      | 0.326            |
|                                   | PTC                | Reference            |                  |
|                                   | FTC                | 1.11(0.91-1.36)      | 0.288            |
|                                   | PTCfv              | 1.95(1.21-3.13)      | <b>0.006</b>     |
| <b>T stage</b>                    | T1a                | Reference            |                  |
|                                   | T1b                | 1.04(0.83-1.32)      | 0.710            |
|                                   | T2                 | 0.99(0.50-1.96)      | 0.977            |
|                                   | T3                 | 1.54(0.82-2.89)      | 0.179            |
|                                   | T4                 | 8.59(3.61-20.45)     | <b>&lt;0.001</b> |
| <b>N stage</b>                    | N0                 | Reference            |                  |
|                                   | N1a                | 1.44(0.76-2.74)      | 0.265            |
|                                   | N1b                | 1.03(0.39-2.71)      | 0.953            |
| <b>Radiotherapy</b>               | Not performed      | Reference            |                  |
|                                   | Performed          | 0.69(0.53-0.89)      | <b>0.004</b>     |
| <b>Age</b>                        | /                  | 1.09(1.08-1.10)      | <b>&lt;0.001</b> |
| <b>Marital status</b>             | Married            | Reference            |                  |
|                                   | Single             | 1.81(1.39-2.35)      | <b>&lt;0.001</b> |
|                                   | Other <sup>c</sup> | 1.59(1.26-2.00)      | <b>&lt;0.001</b> |
|                                   | Unknown            | 1.02(0.65-1.59)      | 0.946            |
| <b>Income</b>                     | < 35K              | Reference            |                  |
|                                   | 35K-<55K           | 1.02(0.54-1.94)      | 0.953            |
|                                   | 55k-<75k           | 0.76(0.40-1.45)      | 0.412            |
|                                   | >75k               | 0.68(0.35-1.32)      | 0.256            |

Note: \*subgroup: immediate: < 1 month, intermediate delayed: ≥1 and ≤2 months, and long delayed: ≥ 3 months; other<sup>a</sup>: defined as the Asian/Pacific Islander and American Indian/Alaska Native; Other<sup>b</sup>: Not listed the detailed location of the primary tumor site; Other<sup>c</sup>: Divorced, separated, widowed, Unmarried or Domestic Partner.

Abbreviation: CI: confidence interval; DTC: differentiated thyroid carcinoma.

Bold values indicate statistical significance ( $p < 0.05$ )

**Table S6-2.** Multivariable analyses of the association of treatment delays intervals with overall survival in DTC (stage II).

| Variables                         | Subgroup*          | Hazard ratio (95%CI) | P                |
|-----------------------------------|--------------------|----------------------|------------------|
| <b>Treatment delays intervals</b> | Immediate          | Reference            |                  |
|                                   | Intermediate       | 0.73(0.41-1.31)      | 0.300            |
|                                   | Long               | 0.22(0.03-1.61)      | 0.138            |
| <b>Race</b>                       | White              | Reference            |                  |
|                                   | Black              | 1.28(0.62-2.67)      | 0.503            |
|                                   | other <sup>a</sup> | 1.45(0.65-3.26)      | 0.366            |
| <b>Grade</b>                      | I                  | Reference            |                  |
|                                   | II                 | 1.38(0.46-4.21)      | 0.564            |
|                                   | III/IV             | 3.47(0.44-27.16)     | 0.236            |
|                                   | Unknown            | 0.86(0.49-1.51)      | 0.608            |
| <b>Histology</b>                  | PTC                | Reference            |                  |
|                                   | FTC                | 1.73(1.00-2.99)      | 0.050            |
|                                   | PTCfv              | 1.46(0.74-2.87)      | 0.278            |
| <b>Radiotherapy</b>               | Not performed      | Reference            |                  |
|                                   | Performed          | 0.42(0.26-0.68)      | <b>&lt;0.001</b> |
| <b>Age</b>                        | /                  | 1.10(1.07-1.13)      | <b>&lt;0.001</b> |
| <b>Marital status</b>             | Married            | Reference            |                  |
|                                   | Single             | 2.58(1.31-5.07)      | <b>0.006</b>     |
|                                   | Other <sup>c</sup> | 1.71(1.01-2.89)      | <b>0.047</b>     |
|                                   | Unknown            | 0.40(0.05-3.00)      | 0.375            |
| <b>Income</b>                     | < 35K              | Reference            |                  |
|                                   | 35K-<55K           | 0.63(0.24-1.67)      | 0.359            |
|                                   | 55k-<75k           | 0.26(0.10-0.71)      | <b>0.008</b>     |
|                                   | >75k               | 0.30(0.11-0.84)      | <b>0.022</b>     |

Note: \*subgroup: immediate: < 1 month, intermediate delayed:  $\geq 1$  and  $\leq 2$  months, and long delayed:  $\geq 3$  months; other<sup>a</sup>: defined as the Asian/Pacific Islander and American Indian/Alaska Native; Other<sup>b</sup>: Not listed the detailed location of the primary tumor site; Other<sup>c</sup>: Divorced, separated, widowed, Unmarried or Domestic Partner.

Abbreviation: CI: confidence interval; DTC: differentiated thyroid carcinoma.

Bold values indicate statistical significance ( $p < 0.05$ )

**Table S7-1.** Multivariable analyses of the association of treatment delays intervals with overall survival in colorectal cancer (stage I).

| Variables                  | Subgroup*          | Hazard ratio (95%CI) | P                |
|----------------------------|--------------------|----------------------|------------------|
| Treatment delays intervals | Immediate          | Reference            |                  |
|                            | Intermediate       | 0.83(0.75-0.92)      | <b>&lt;0.001</b> |
|                            | Long               | 1.21(0.97-1.52)      | 0.090            |
| Race                       | White              | Reference            |                  |
|                            | Black              | 1.17(1.02-1.34)      | <b>0.027</b>     |
|                            | other <sup>a</sup> | 0.78(0.65-0.94)      | <b>0.008</b>     |
| Location                   | Right              | Reference            |                  |
|                            | Left               | 1.03(0.92-1.15)      | 0.610            |
|                            | Rectum             | 1.06(0.94-1.20)      | 0.324            |
|                            | Other <sup>b</sup> | 1.50(1.00-2.26)      | <b>0.049</b>     |
| Grade                      | I                  | Reference            |                  |
|                            | II                 | 1.02(0.89-1.16)      | 0.789            |
|                            | III/IV             | 1.15(0.95-1.40)      | 0.161            |
|                            | Unknown            | 0.93(0.75-1.15)      | 0.498            |
| T stage                    | T1                 | Reference            |                  |
|                            | T2                 | 1.16(1.06-1.28)      | <b>0.001</b>     |
| Surgery                    | Not performed      | Reference            |                  |
|                            | Performed          | 0.29(0.22-0.39)      | <b>&lt;0.001</b> |
| Radiotherapy               | Not performed      | Reference            |                  |
|                            | Performed          | 0.94(0.67-1.29)      | 0.711            |
| Chemotherapy               | Not performed      | Reference            |                  |
|                            | Performed          | 1.58(1.17-2.12)      | <b>0.003</b>     |
| Age                        | /                  | 1.08(1.07-1.08)      | <b>&lt;0.001</b> |
| Marital status             | Married            | Reference            |                  |
|                            | Single             | 1.62(1.40-1.87)      | <b>&lt;0.001</b> |
|                            | Other <sup>c</sup> | 1.38(1.24-1.53)      | <b>&lt;0.001</b> |
|                            | Unknown            | 1.14(0.95-1.37)      | 0.168            |
| Income                     | < 35K              | Reference            |                  |
|                            | 35K-<55K           | 0.93(0.70-1.23)      | 0.613            |
|                            | 55k-<75k           | 0.76(0.68-1.00)      | 0.056            |
|                            | >75k               | 0.64(0.48-0.85)      | <b>0.002</b>     |

Note: \*subgroup: immediate: < 1 month, intermediate delayed: ≥1 and ≤2 months, and long delayed: ≥ 3 months; other<sup>a</sup>: defined as the Asian/Pacific Islander and American Indian/Alaska Native; Other<sup>b</sup>: Not listed the detailed location of the primary tumor site; Other<sup>c</sup>: Divorced, separated, widowed, Unmarried or Domestic Partner.

Abbreviation: CI: confidence interval.

Bold values indicate statistical significance ( $p < 0.05$ )

**Table S7-2.** Multivariable analyses of the association of treatment delays intervals with overall survival in colorectal cancer (stage II).

| Variables | Subgroup* | Hazard ratio (95%CI) | P |
|-----------|-----------|----------------------|---|
|-----------|-----------|----------------------|---|

|                                   |                    |                 |                  |
|-----------------------------------|--------------------|-----------------|------------------|
| <b>Treatment delays intervals</b> | Immediate          | Reference       |                  |
|                                   | Intermediate       | 0.70(0.65-0.75) | <b>&lt;0.001</b> |
|                                   | Long               | 0.87(0.72-1.04) | 0.120            |
| <b>Race</b>                       | White              | Reference       |                  |
|                                   | Black              | 1.18(1.07-1.31) | <b>0.002</b>     |
|                                   | other <sup>a</sup> | 0.82(0.72-0.93) | <b>0.003</b>     |
| <b>Location</b>                   | Right              | Reference       |                  |
|                                   | Left               | 1.17(1.08-1.27) | <b>&lt;0.001</b> |
|                                   | Rectum             | 1.36(1.21-1.53) | <b>&lt;0.001</b> |
|                                   | Other <sup>b</sup> | 1.18(0.92-1.51) | <b>&lt;0.001</b> |
| <b>Grade</b>                      | I                  | Reference       | 0.203            |
|                                   | II                 | 1.08(0.94-1.23) | 0.290            |
|                                   | III/IV             | 1.21(1.04-1.41) | <b>0.012</b>     |
|                                   | Unknown            | 1.19(0.95-1.48) | 0.129            |
| <b>T stage</b>                    | T3                 | Reference       |                  |
|                                   | T4                 | 2.19(2.02-2.37) | <b>&lt;0.001</b> |
| <b>Surgery</b>                    | Not performed      | Reference       |                  |
|                                   | performed          | 0.29(0.24-0.34) | <b>&lt;0.001</b> |
| <b>Radiotherapy</b>               | Not performed      | Reference       |                  |
|                                   | performed          | 1.08(0.94-1.26) | 0.278            |
| <b>Chemotherapy</b>               | Not performed      | Reference       |                  |
|                                   | performed          | 0.82(0.74-0.91) | <b>&lt;0.001</b> |
| <b>Age</b>                        | /                  | 1.05(1.05-1.06) | <b>&lt;0.001</b> |
| <b>Marital status</b>             | Married            | Reference       |                  |
|                                   | Single             | 1.48(1.33-1.64) | <b>&lt;0.001</b> |
|                                   | Other <sup>c</sup> | 1.33(1.23-1.44) | <b>&lt;0.001</b> |
|                                   | Unknown            | 1.19(1.02-1.38) | <b>0.029</b>     |
| <b>Income</b>                     | < 35K              | Reference       |                  |
|                                   | 35K-<55K           | 0.83(0.68-1.01) | 0.066            |
|                                   | 55k-<75k           | 0.73(0.60-0.89) | <b>0.002</b>     |
|                                   | >75k               | 0.68(0.55-0.83) | <b>&lt;0.001</b> |

Note: \*subgroup: immediate: < 1 month, intermediate delayed:  $\geq 1$  and  $\leq 2$  months, and long delayed:  $\geq 3$  months; other<sup>a</sup>: defined as the Asian/Pacific Islander and American Indian/Alaska Native; Other<sup>b</sup>: Not listed the detailed location of the primary tumor site; Other<sup>c</sup>: Divorced, separated, windowed, Unmarried or Domestic Partner.

Abbreviation: CI: confidence interval.

Bold values indicate statistical significance ( $p < 0.05$ )

**Table S8-1.** Multivariable analyses of the association of treatment delays intervals with overall survival in cervical cancer (stage I).

| Variables                  | Subgroup*          | Hazard ratio (95%CI) | P                |
|----------------------------|--------------------|----------------------|------------------|
| Treatment delays intervals | Immediate          | Reference            |                  |
|                            | Intermediate       | 1.08(0.90-1.30)      | 0.421            |
|                            | Long               | 0.84(0.63-1.14)      | 0.282            |
| Race                       | White              | Reference            |                  |
|                            | Black              | 1.62(1.30-2.02)      | <b>&lt;0.001</b> |
|                            | other <sup>a</sup> | 0.91(0.68-1.22)      | 0.546            |
| Grade                      | I                  | Reference            |                  |
|                            | II                 | 1.34(0.99-1.81)      | 0.061            |
|                            | III/IV             | 2.29(1.69-3.10)      | <b>&lt;0.001</b> |
|                            | Unknown            | 1.36(0.98-1.88)      | <b>0.064</b>     |
| Histology                  | Squamous           | Reference            |                  |
|                            | Adenocarcinoma     | 1.05(0.86-1.28)      | 0.621            |
|                            | Adenosquamous      | 1.25(0.85-1.83)      | 0.255            |
| T stage                    | T1                 | Reference            |                  |
|                            | T2                 | 2.03(0.94-4.40)      | 0.071            |
| Surgery                    | Not performed      | Reference            |                  |
|                            | Performed          | 0.47(0.37-0.59)      | <b>&lt;0.001</b> |
| Radiotherapy               | Not performed      | Reference            |                  |
|                            | Performed          | 2.34(1.85-2.97)      | <b>&lt;0.001</b> |
| Chemotherapy               | Not performed      | Reference            |                  |
|                            | Performed          | 0.96(0.77-1.21)      | 0.740            |
| Age                        | /                  | 1.03(1.02-1.04)      | <b>&lt;0.001</b> |
| Marital status             | Married            | Reference            |                  |
|                            | Single             | 1.16(0.95-1.43)      | 0.147            |
|                            | Other <sup>c</sup> | 1.30(1.06-1.61)      | <b>0.013</b>     |
|                            | Unknown            | 1.16(0.82-1.64)      | 0.402            |
| Income                     | < 35K              | Reference            |                  |
|                            | 35K-<55K           | 1.08(0.62-1.87)      | 0.787            |
|                            | 55k-<75k           | 1.10(0.64-1.90)      | 0.726            |
|                            | >75k               | 0.79(0.45-1.39)      | 0.413            |

Note: \*subgroup: immediate: < 1 month, intermediate delayed:  $\geq 1$  and  $\leq 2$  months, and long delayed:  $\geq 3$  months; other<sup>a</sup>: defined as the Asian/Pacific Islander and American Indian/Alaska Native; Other<sup>b</sup>: Not listed the detailed location of the primary tumor site; Other<sup>c</sup>: Divorced, separated, widowed, Unmarried or Domestic Partner.

Abbreviation: CI: confidence interval.

Bold values indicate statistical significance ( $p < 0.05$ )

**Table S8-2.** Multivariable analyses of the association of treatment delays intervals with overall survival in cervical cancer (stage II).

| Variables                  | Subgroup* | Hazard ratio (95%CI) | P |
|----------------------------|-----------|----------------------|---|
| Treatment delays intervals | Immediate | Reference            |   |

|                       |                    |                 |                  |
|-----------------------|--------------------|-----------------|------------------|
|                       | Intermediate       | 0.92(0.74-1.14) | 0.436            |
|                       | Long               | 1.01(0.75-1.37) | 0.949            |
| <b>Race</b>           | White              | Reference       |                  |
|                       | Black              | 1.19(0.95-1.49) | 0.139            |
|                       | other <sup>a</sup> | 0.99(0.76-1.28) | 0.938            |
| <b>Grade</b>          | I                  | Reference       |                  |
|                       | II                 | 1.46(0.95-2.25) | 0.087            |
|                       | III/IV             | 1.54(0.99-2.38) | 0.054            |
|                       | Unknown            | 1.54(0.99-2.38) | 0.057            |
| <b>Histology</b>      | Squamous           | Reference       |                  |
|                       | Adenocarcinoma     | 1.23(0.99-1.53) | 0.058            |
|                       | Adenosquamous      | 1.18(0.80-1.74) | 0.408            |
| <b>Surgery</b>        | Not performed      | Reference       |                  |
|                       | performed          | 0.77(0.62-0.95) | <b>0.017</b>     |
| <b>Radiotherapy</b>   | Not performed      | Reference       |                  |
|                       | performed          | 0.61(0.42-0.89) | <b>0.011</b>     |
| <b>Chemotherapy</b>   | Not performed      | Reference       |                  |
|                       | performed          | 0.99(0.76-1.32) | 0.964            |
| <b>Age</b>            | /                  | 1.01(1.00-1.02) | <b>&lt;0.001</b> |
| <b>Marital status</b> | Married            | Reference       |                  |
|                       | Single             | 1.23(0.99-1.51) | 0.058            |
|                       | Other <sup>c</sup> | 1.22(0.98-1.52) | 0.074            |
|                       | Unknown            | 1.23(0.82-1.85) | 0.315            |
| <b>Income</b>         | < 35K              | Reference       |                  |
|                       | 35K-<55K           | 0.86(0.52-1.42) | 0.560            |
|                       | 55k-<75k           | 0.82(0.50-1.35) | 0.447            |
|                       | >75k               | 0.73(0.43-1.22) | 0.227            |

Note: \*subgroup: immediate: < 1 month, intermediate delayed:  $\geq 1$  and  $\leq 2$  months, and long delayed:  $\geq 3$  months; other<sup>a</sup>: defined as the Asian/Pacific Islander and American Indian/Alaska Native; Other<sup>b</sup>: Not listed the detailed location of the primary tumor site; Other<sup>c</sup>: Divorced, separated, widowed, Unmarried or Domestic Partner.

Abbreviation: CI: confidence interval.

Bold values indicate statistical significance ( $p < 0.05$ )
